# Supplementary material for: Efficient one-pot syntheses of secondary amines from nitro aromatics and benzyl alcohols over Pd/NiTi-LDH under visible light
Source: Royal Society of Chemistry journal article supplement (doi:10.1039/d3dt02821f), 2023-01-01

**Fig. S1** ESR spectrum of 2.0 wt% NiTi-LDH.

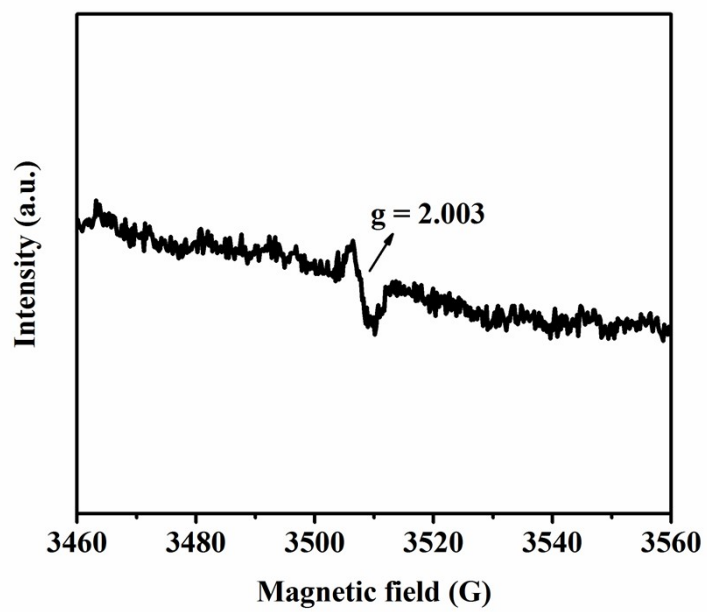

**Fig. S2** XPS spectrum of NiTi-LDH in O 1s region.

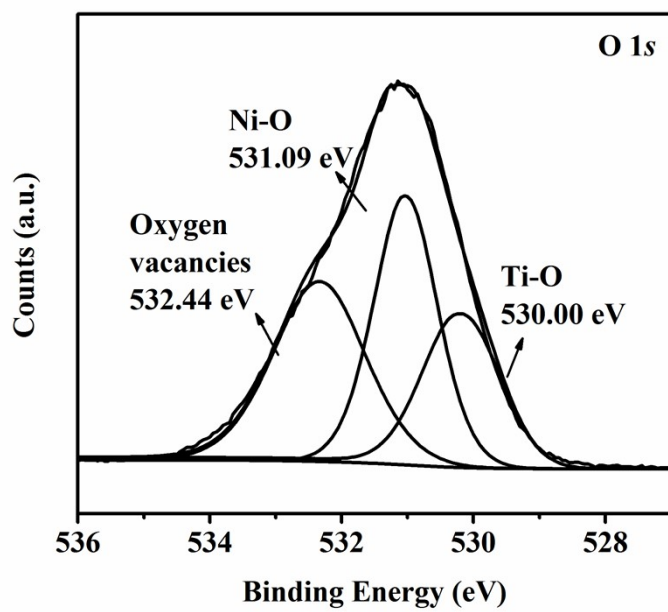

**Fig. S3** XPS spectrum of NiTi-LDH in Ti 2p region.

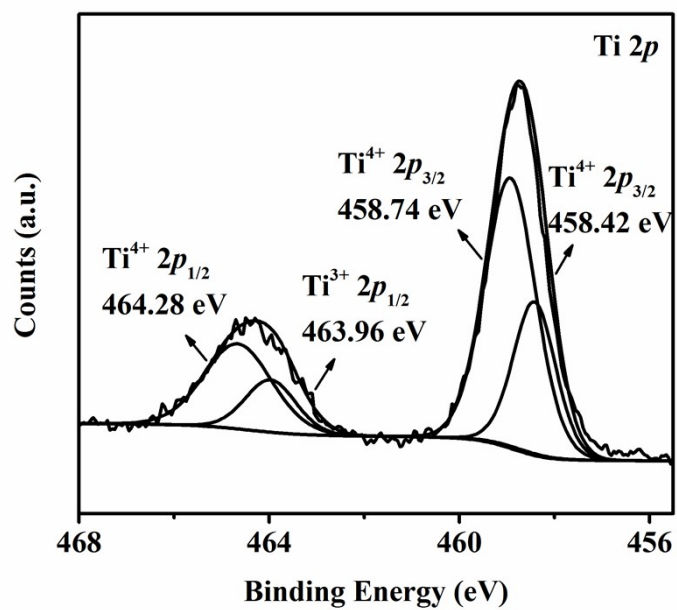

**Fig. S4** XPS spectrum of NiTi-LDH in Ni 2p region.

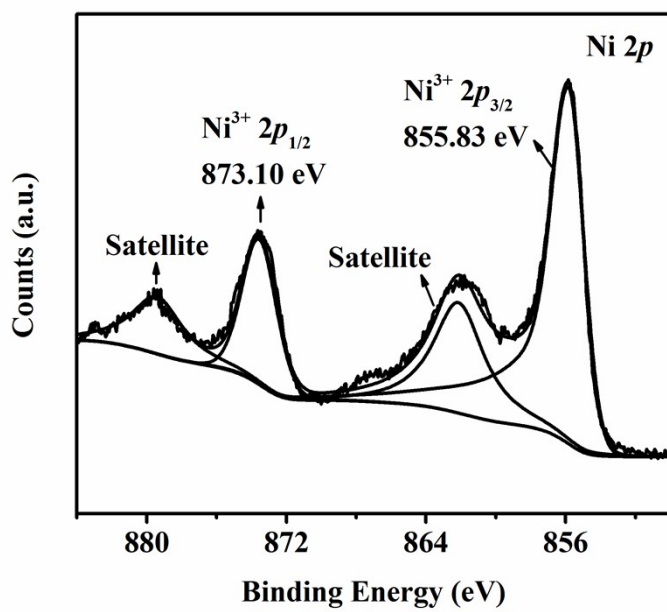

**Fig. S5** (a) SEM and (b) TEM images of 2.0 wt% Pd/NiTi-LDH.

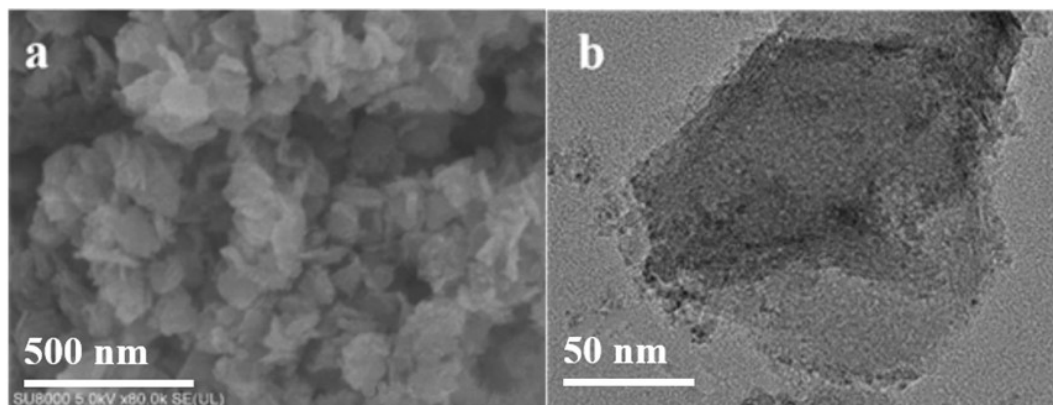

**Fig. S6** Zeta potentials of NiTi-LDH.

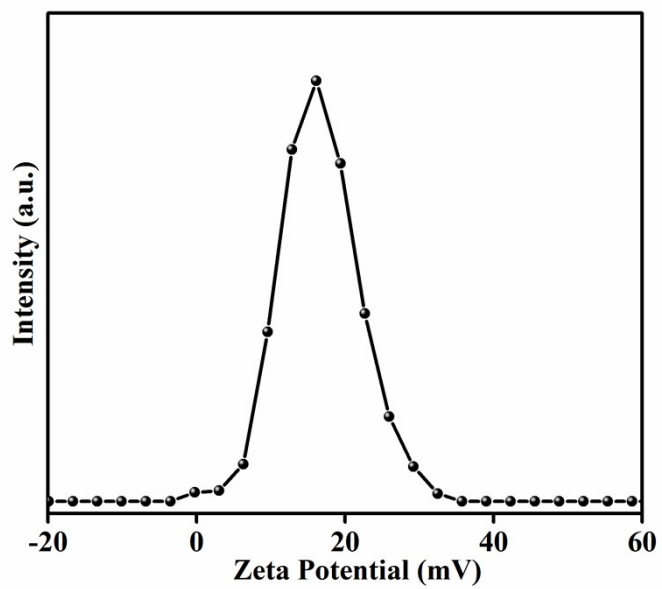

**Fig. S7** Post-mortem TPD spectra revealing the desorption of active H from the used 2.0 wt% Pd/NiTi-LDH recovered from the reaction system using (a) bare benzyl alcohol and (b) a mixed solvent of benzyl alcohol/acetonitrile (5:1) as the solvent.

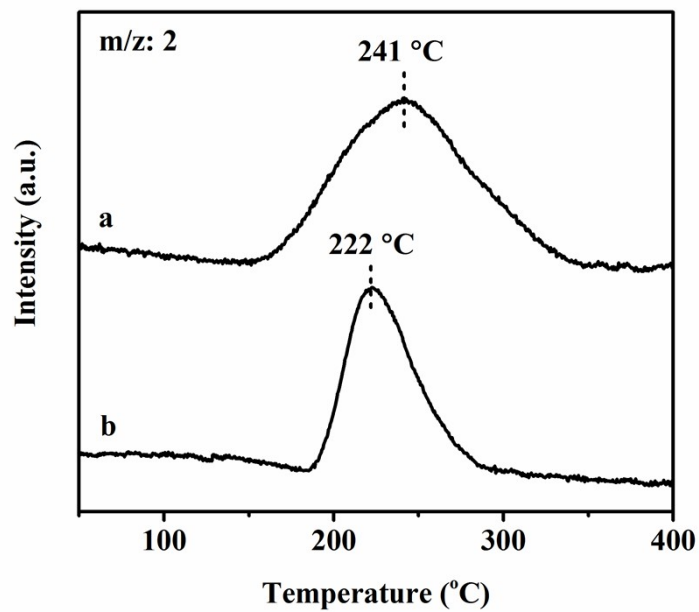

**Fig. S8** FT-IR spectra of NiTi-LDH and urea.

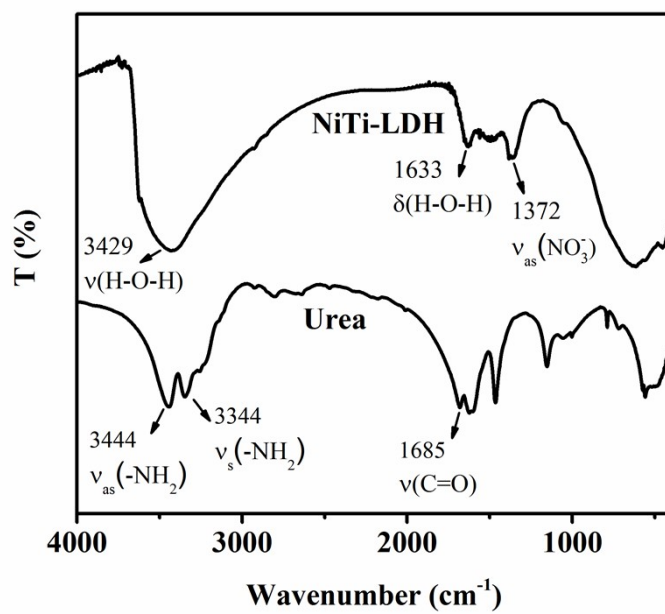

Supplement: d3dt02821f1.pdf [file d3dt02821f1.pdf]
